# Supplementary material
Source: Springer Nature journal article supplement (https://www.springermedizin.de/resource/supplementary/12936_2009_1136_MOESM5_ESM.pdf/9549948)

Habitat/location (or site)

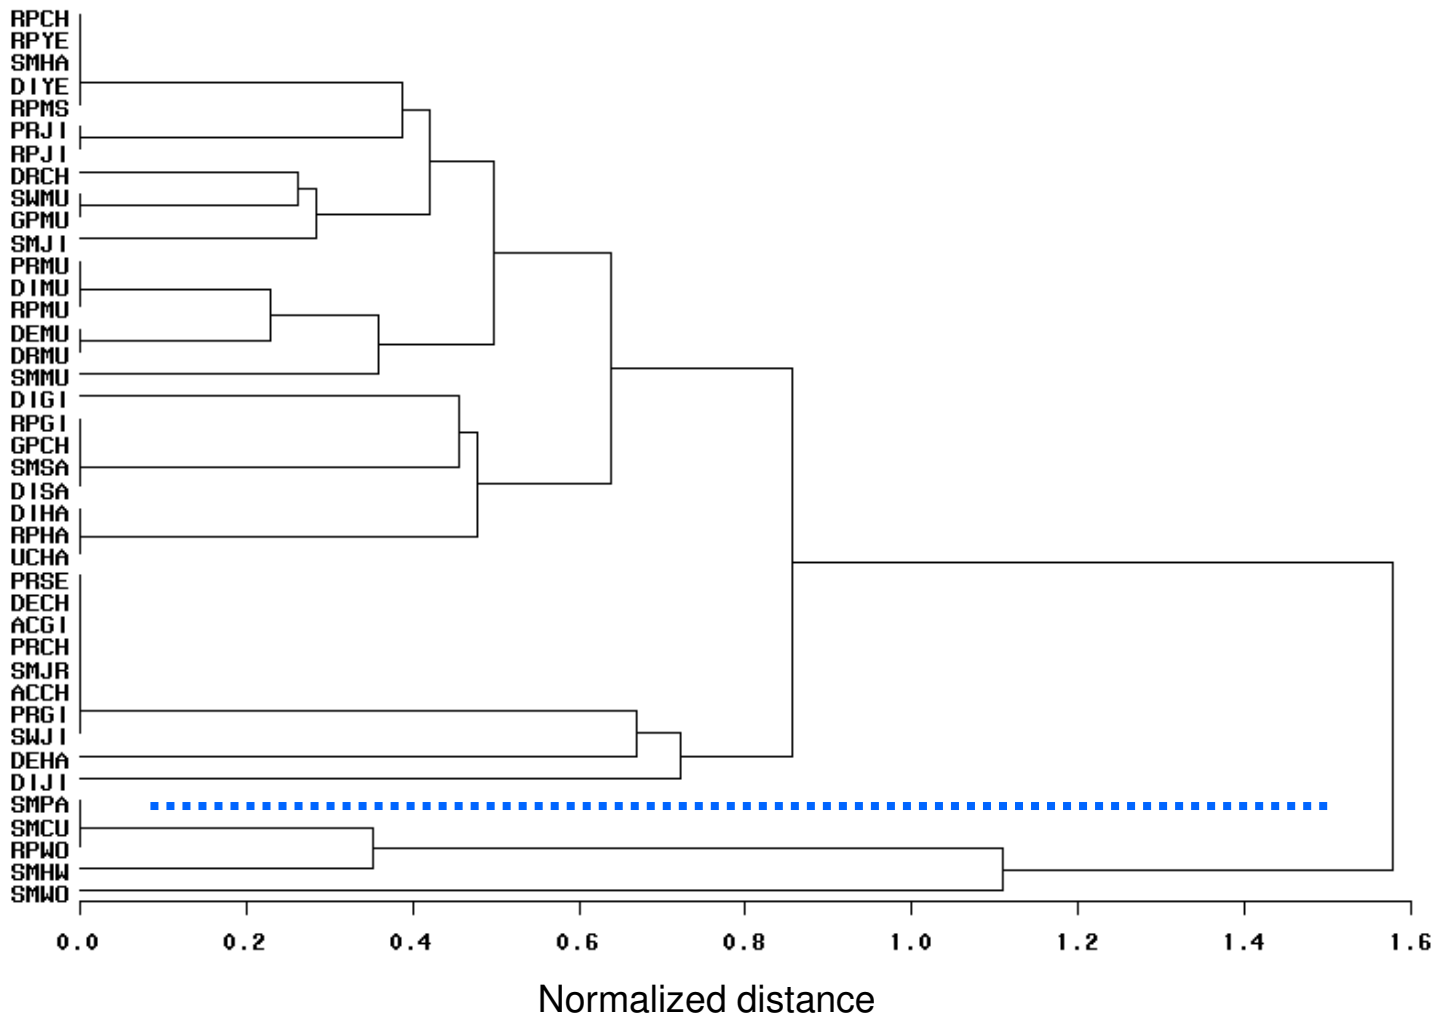

Supplement: MOESM5 [file 9549948]
